# Supplementary material for: Comparison of Oral, Intranasal and Aerosol Administration of Amiodarone in Rats as a Model of Pulmonary Phospholipidosis
Source: MDPI journal article supplement (doi:10.3390/pharmaceutics11070345), 2019-07-17
Supplement: s1 [file s1]

# Supplementary Materials: Comparison of Oral, Intranasal and Aerosol Administration of Amiodarone in Rats as a Model of Pulmonary Phospholipidosis

Aateka Patel, Ewelina Hoffman, Doug Ball, Jan Klapwijk, Rory T. Steven, Alex Dexter, Josephine Bunch, Daniel Baker, Darragh Murnane, Victoria Hutter, Clive Page, Lea Ann Dailey and Ben Forbes

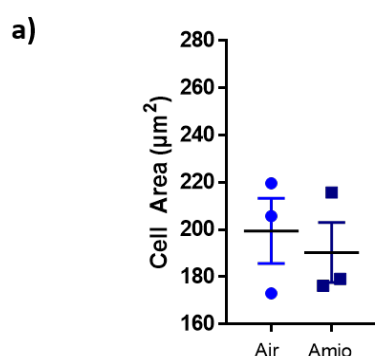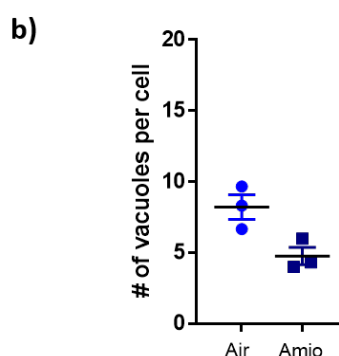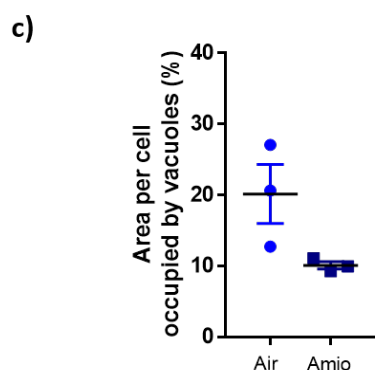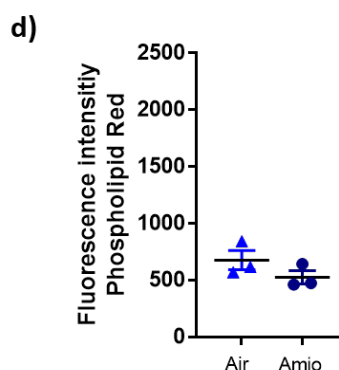

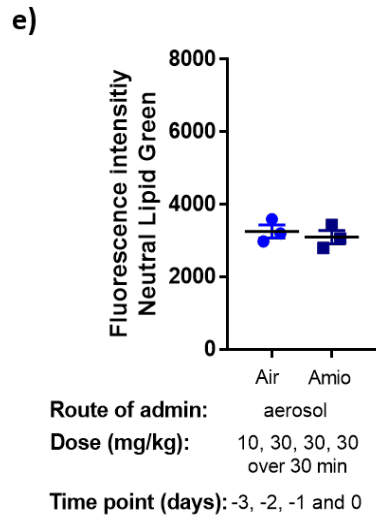

**Figure S1.** Median cell area (a), number of vacuoles per cell (b), percentage of cell area occupied by vacuoles (c), intensity of phospholipid stain (d) and neutral lipid stain (e) are reported for macrophages isolated from BAL on day 7 post-dosing. Each data point represents the mean  $\pm$  standard error of the mean (SEM) of triplicate samples per rat ( $n = 3-6$  animals).

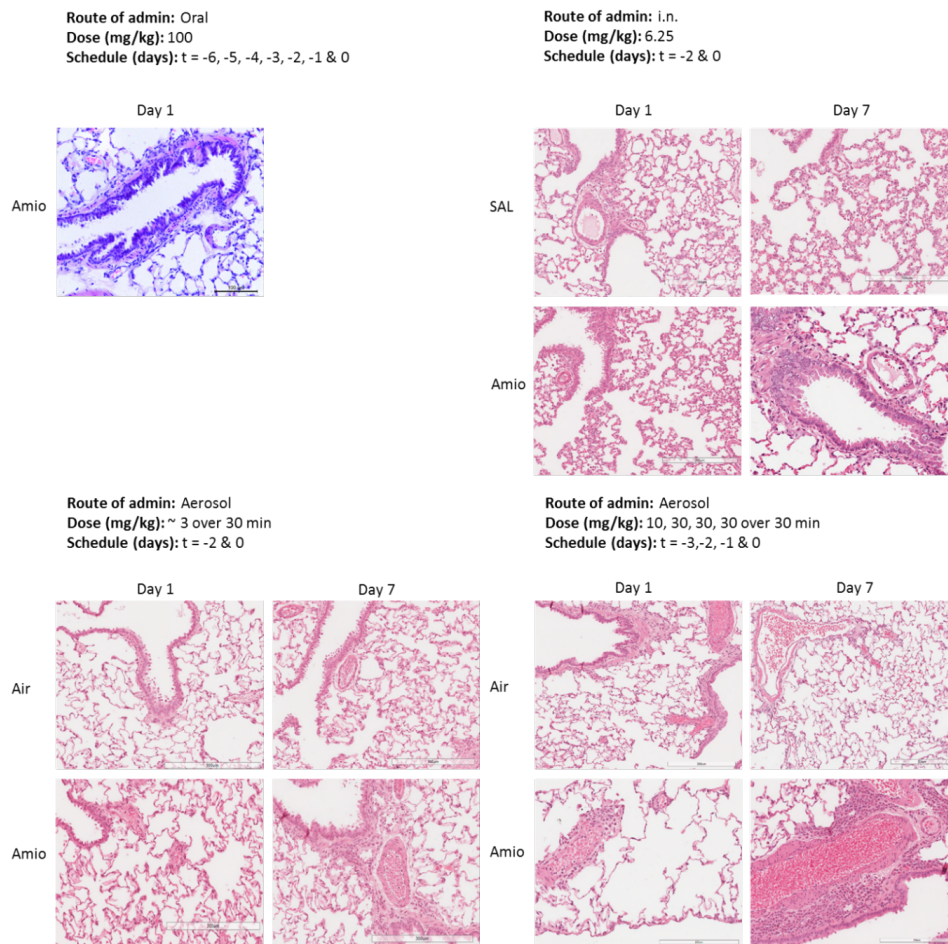

**Figure S2.** Histopathology ( $\times 10$  magnification) of lung tissue exposed to amiodarone. Representative images of lung tissue harvested at day 1 and day 7 following treatment (amiodarone) or air/saline control.
